# Supplementary material for: Conserved Autophagy Pathway Contributes to Stress Tolerance and Virulence and Differentially Controls Autophagic Flux Upon Nutrient Starvation in Cryptococcus neoformans
Source: Front Microbiol. 2019 Nov 26;10:2690. doi: 10.3389/fmicb.2019.02690 (PMC6988817; doi:10.3389/fmicb.2019.02690)
Supplement: Supplementary file 2 [file Table_1.xlsx]

## Sheet: Sheet1
Table S1
Yeast strains used in this study
Strain	Genotype
H99	MAT α
CNH9901	H99 atg1∆::hyg
CNH9902	H99 atg2∆::hyg
CNH9903	H99 atg3∆::hyg
CNH9904	H99 atg4∆::hyg
CNH9905	H99 atg5∆::hyg
CNH9906	H99 atg6∆::hyg
CNH9907	H99 atg7∆::hyg
CNH9908	H99 atg8∆::hyg
CNH9909	H99 atg9∆::hyg
CNH9911	H99 atg11∆::hyg
CNH9912	H99 atg12∆::hyg
CNH9913	H99 atg13∆::hyg
CNH991403	H99 atg14-03∆::hyg
CNH991405	H99 atg14-05∆::hyg
CNH9915	H99 atg15∆::hyg
CNH9916	H99 atg16∆::hyg
CNH9918	H99 atg18∆::hyg
CNH9920	H99 atg20∆::hyg
CNH9922	H99 atg22∆::hyg
CNH9924	H99 atg24∆::hyg
CNH9926	H99 atg26∆::hyg
CNH9927	H99 atg27∆::hyg
CNH990108	H99 atg1∆::hyg EGFP-atg8+G418
CNH990208	H99 atg2∆::hyg EGFP-atg8+G418
CNH990308	H99 atg3∆::hyg EGFP-atg8+G418
CNH990408	H99 atg4∆::hyg EGFP-atg8+G418
CNH990508	H99 atg5∆::hyg EGFP-atg8+G418
CNH990608	H99 atg6∆::hyg EGFP-atg8+G418
CNH990708	H99 atg7∆::hyg EGFP-atg8+G418
CNH990908	H99 atg9∆::hyg EGFP-atg8+G418
CNH991108	H99 atg11∆::hyg EGFP-atg8+G418
CNH991208	H99 atg12∆::hyg EGFP-atg8+G418
CNH991308	H99 atg13∆::hyg EGFP-atg8+G418
CNH99140308	H99 atg14-03∆::hyg EGFP-atg8+G418
CNH99140508	H99 atg14-05∆::hyg EGFP-atg8+G418
CNH991608	H99 atg16∆::hyg EGFP-atg8+G418
CNH991808	H99 atg18∆::hyg EGFP-atg8+G418
CNH9901C	H99 atg1∆::hyg ATG1+G418
CNH9907C	H99 atg1∆::hyg ATG7+G418
CNH9908C	H99 atg1∆::hyg ATG8+G418
CNH9909C	H99 atg1∆::hyg ATG8+G418
